# Supplementary material for: Anticoagulation in pulmonary arterial hypertension: a decision analysis
Source: PubMed Central journal article supplement — Pulm Circ. 2019 Dec 23;9(4):2045894019895451. doi: 10.1177/2045894019895451 (PMC6928543; doi:10.1177/2045894019895451), 2019-12-23
Supplement: PUL895451_Supplemental_Material.pdf [file PUL895451_Supplemental_Material.pdf]

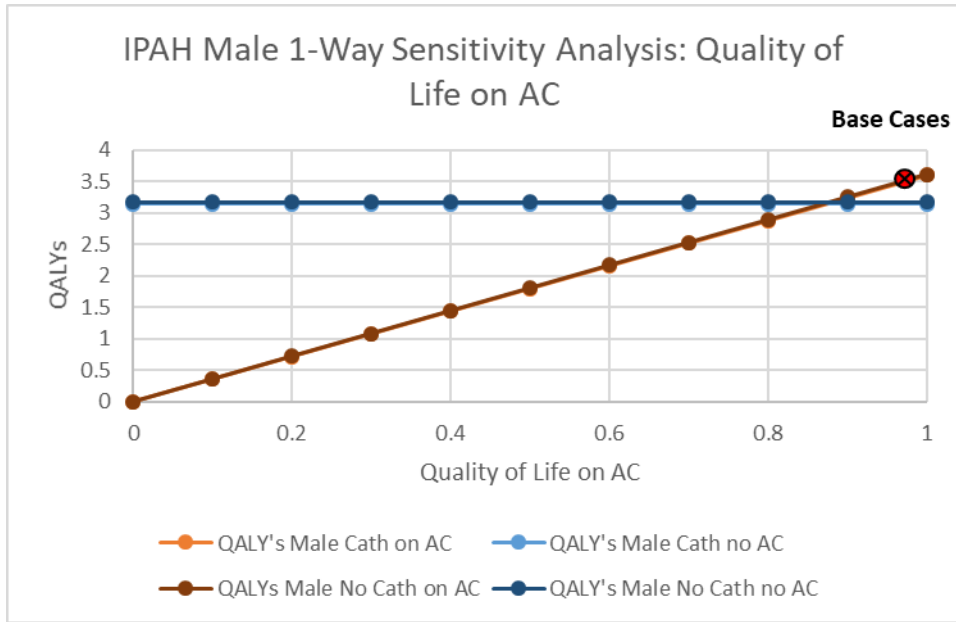

Abbreviations – AC = Anticoagulation, QALY = Quality-Adjusted Life Years, IPAH = Idiopathic Pulmonary Arterial Hypertension, OCP = Oral Contraceptive Pills  
**e-Figure 1 – Sensitivity Analysis on IPAH Males Quality of Life with AC**

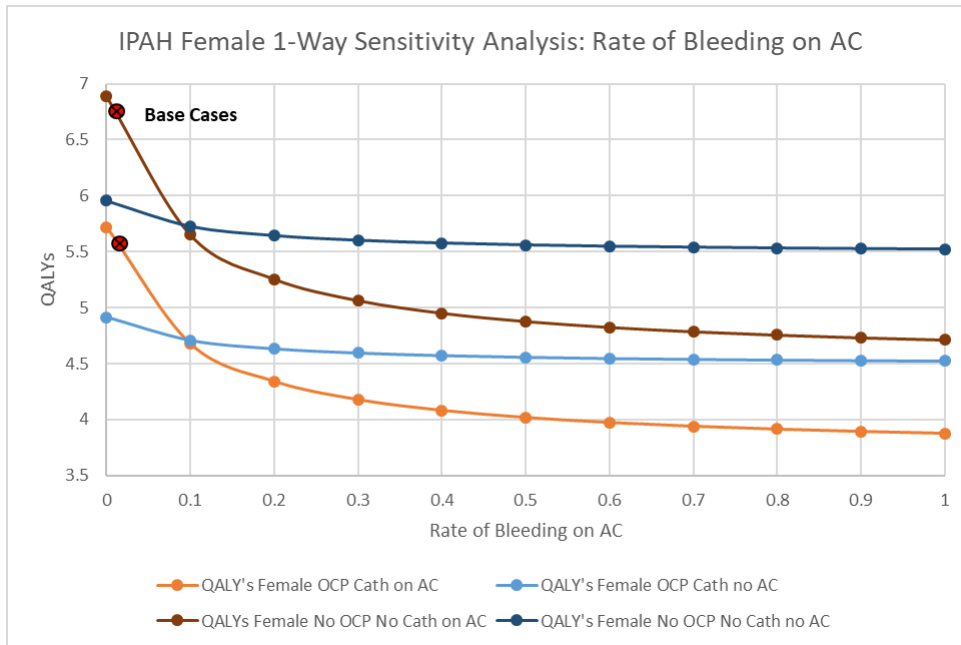

Abbreviations – AC = Anticoagulation, QALY = Quality-Adjusted Life Years, IPAH = Idiopathic Pulmonary Arterial Hypertension, OCP = Oral Contraceptive Pills  
**e-Figure 2 – Sensitivity Analysis on IPAH Females Rate of Bleeding on AC**

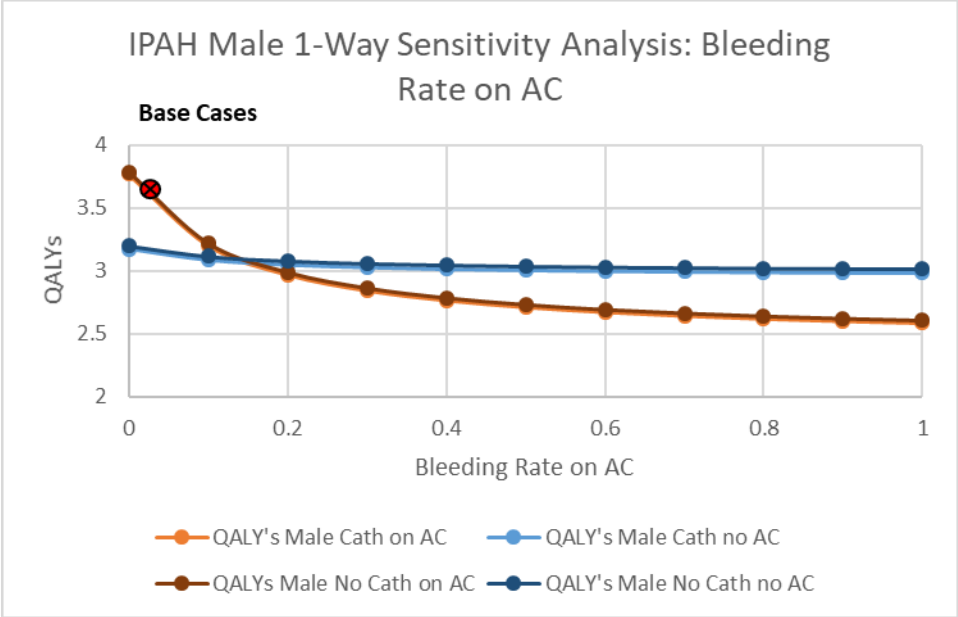

Abbreviations – AC = Anticoagulation, QALY = Quality-Adjusted Life Years, IPAH = Idiopathic Pulmonary Arterial Hypertension  
**e-Figure 3 – Sensitivity Analysis on IPAH Males Rate of Bleeding on AC**

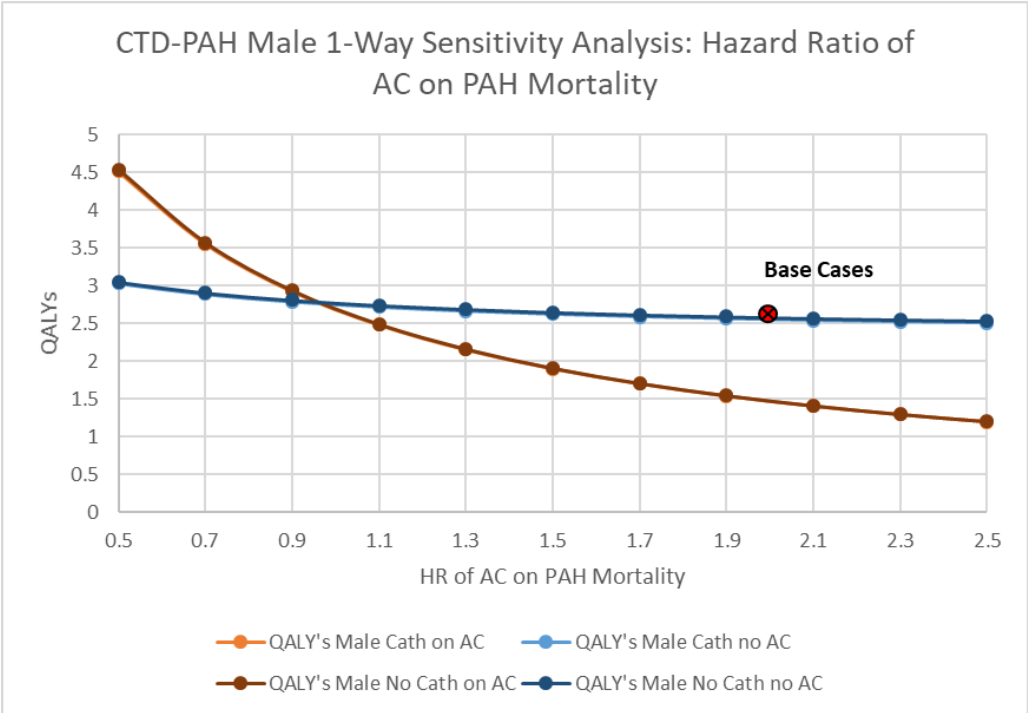

Abbreviations – AC = Anticoagulation, CTD-PAH = Connective-Tissue-Disease Associated Pulmonary Arterial Hypertension  
**e-Figure 4 – Sensitivity Analysis on CTD-PAH Males Hazard Ratio of AC on PAH Mortality**

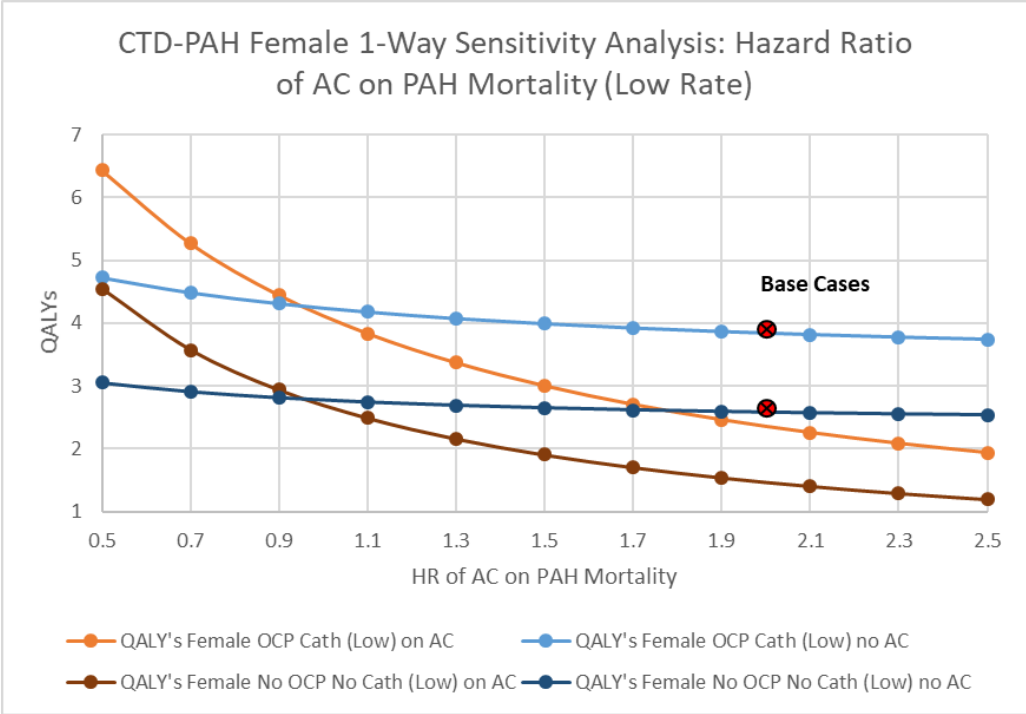

Abbreviations – AC = Anticoagulation, CTD-PAH = Connective-Tissue-Disease Associated Pulmonary Arterial Hypertension, OCP = Oral Contraceptive Pills

**e-Figure 5 – Sensitivity Analysis on CTD-PAH Females Hazard Ratio of AC on PAH Mortality (Low Mortality Rates)**

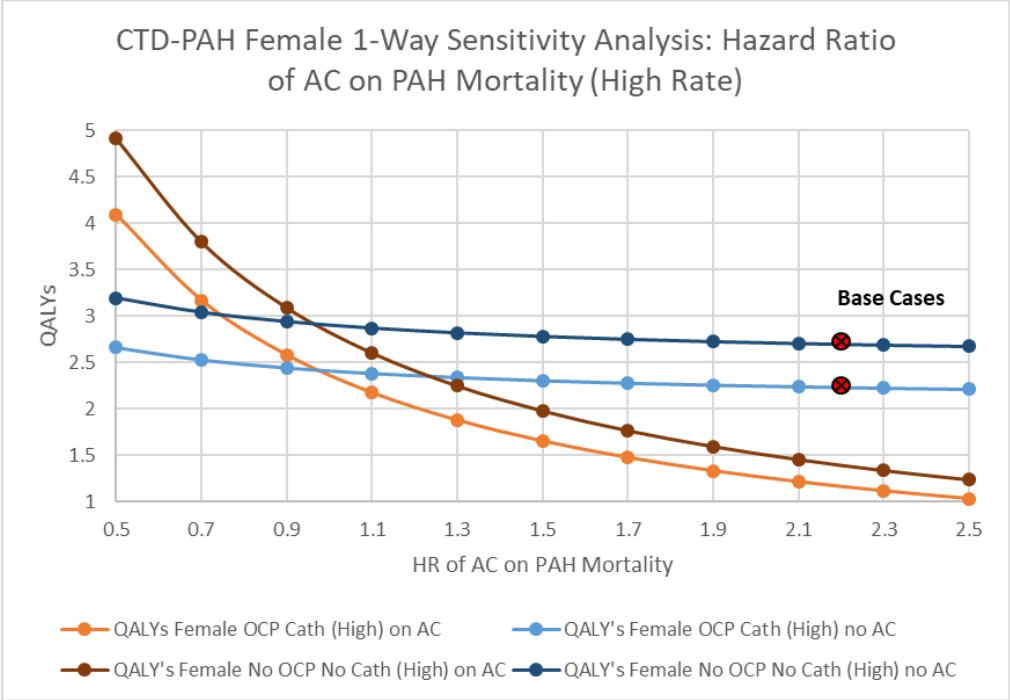

Abbreviations – AC = Anticoagulation, CTD-PAH = Connective-Tissue-Disease Associated Pulmonary Arterial Hypertension, OCP = Oral Contraceptive Pills

**e-Figure 6 – Sensitivity Analysis on CTD-PAH Females Hazard Ratio of AC on PAH**

**Mortality (High Mortality Rates)**

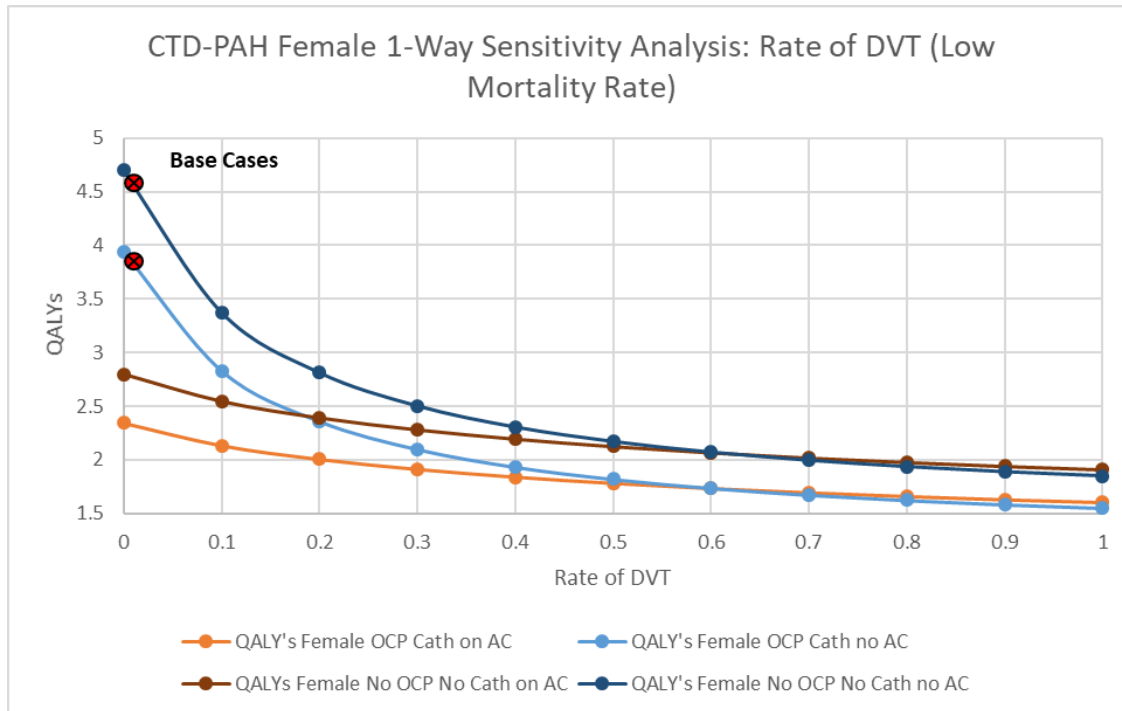

Abbreviations – AC = Anticoagulation, CTD-PAH = Connective-Tissue-Disease Associated Pulmonary Arterial Hypertension, DVT = Deep Vein Thrombosis, OCP = Oral Contraceptive Pills

**e-Figure 7 – Sensitivity Analysis on CTD-PAH (Low Mortality Rates) Annual Rate of DVT**

Table S1 – Base Case Analyses with DOAC therapy

| Disease State Entering Markov Model            | Anticoagulate (QALYs) | Do Not Anticoagulate (QALYs) |
|------------------------------------------------|-----------------------|------------------------------|
| IPAH Male Cath                                 | <b>3.61</b>           | 3.11                         |
| IPAH Male No Cath                              | <b>4.36</b>           | 3.79                         |
| IPAH Female No OCP No Cath                     | <b>6.53</b>           | 5.90                         |
| IPAH Female OCP Cath                           | <b>5.37</b>           | 4.75                         |
| CTD-PAH Male Cath (High Mortality)             | 0.78                  | <b>1.44</b>                  |
| CTD-PAH Male No Cath (High Mortality)          | 0.94                  | <b>1.75</b>                  |
| CTD-PAH Female No OCP No Cath (High Mortality) | 1.51                  | <b>2.71</b>                  |

|                                               |      |             |
|-----------------------------------------------|------|-------------|
| CTD-PAH Female OCP Cath (High Mortality)      | 1.26 | <b>2.20</b> |
| CTD-PAH Male Cath (Low Mortality)             | 1.45 | <b>2.50</b> |
| CTD-PAH Male No Cath (Low Mortality)          | 1.74 | <b>3.07</b> |
| CTD-PAH Female No OCP No Cath (Low Mortality) | 2.80 | <b>4.68</b> |
| CTD-PAH Female OCP Cath (Low Mortality)       | 2.32 | <b>3.71</b> |

Abbreviations – IPAH = Idiopathic Pulmonary Arterial Hypertension, CTD-PAH = Connective-Tissue-Disease associated Pulmonary Arterial Hypertension, DOAC = Direct Oral Anticoagulation therapy, AC = Anticoagulation with DOAC therapy, QALY = Quality-Adjusted Life Years, Cath = presence of central catheter, OCP = Use of oral contraceptive medications, High and Low Mortality = Annual survival estimates in CTD-PAH patients of 55% and 85% respectively

**BOLD** - Favored Strategy based on higher Utility

Model utilizes a quality-adjustment factor (Q=1) for DOAC therapy, with a modeled rate of bleeding of 2.13% annually, and a relative risk of venous thromboembolism while on anticoagulation of 0.47, and a hazard rate for stroke of 0.205 in men and 0.387 in women.

Table S2 – Base Case Analyses in PAH Patients with Multiple Medical Comorbidities

| Disease State Entering Markov Model | Anticoagulate (QALYs) | Do Not Anticoagulate (QALYs) |
|-------------------------------------|-----------------------|------------------------------|
| IPAH Male Cath                      | <b>2.22</b>           | 1.94                         |
| IPAH Male No Cath                   | <b>2.70</b>           | 2.37                         |
| IPAH Female No OCP No Cath          | <b>4.11</b>           | 3.75                         |
| IPAH Female OCP Cath                | <b>3.33</b>           | 2.98                         |
| CTD-PAH Male Cath                   | 0.79                  | <b>1.41</b>                  |
| CTD-PAH Male No Cath                | 0.95                  | <b>1.75</b>                  |
| CTD-PAH Female No OCP No Cath       | 1.54                  | <b>2.71</b>                  |
| CTD-PAH Female OCP Cath             | 1.27                  | <b>2.12</b>                  |

Abbreviations – IPAH = Idiopathic Pulmonary Arterial Hypertension, CTD-PAH = Connective-Tissue-Disease associated Pulmonary Arterial Hypertension, AC = Anticoagulation with DOAC therapy, QALY = Quality-Adjusted Life Years, Cath = presence of central catheter, OCP = Use of oral contraceptive medications

**BOLD** - Favored Strategy based on higher Utility

Multiple medical comorbidities include hypertension, diabetes mellitus, and chronic obstructive pulmonary disease. Model utilizes an increased rate of mortality in PAH patients (3-year mortality rate of 38% in IPAH and 85% in CTD-PAH), increased risk of stroke following atrial fibrillation (4% annually in men, 6.7% annually in women), doubled rates of deep vein thrombosis, and increased bleeding on AC (5% annually).
